# Supplementary material for: A Multilayer Functionalized Drug-Eluting Balloon for Treatment of Coronary Artery Disease
Source: Pharmaceutics. 2021 Apr 23;13(5):614. doi: 10.3390/pharmaceutics13050614 (PMC8146216; doi:10.3390/pharmaceutics13050614)
Supplement: Supplementary file 1 [file pharmaceutics-13-00614-s001.zip › pharmaceutics-1185676-supplementary.pdf]

# Supplementary Materials: A Multilayer Functionalized Drug-Eluting Balloon for Treatment of Coronary Artery Disease

Hak-Il Lee, Won-Kyu Rhim, Eun Young Kang, Bogyu Choi, Jun Hyeok Kim and Dong Keun Han

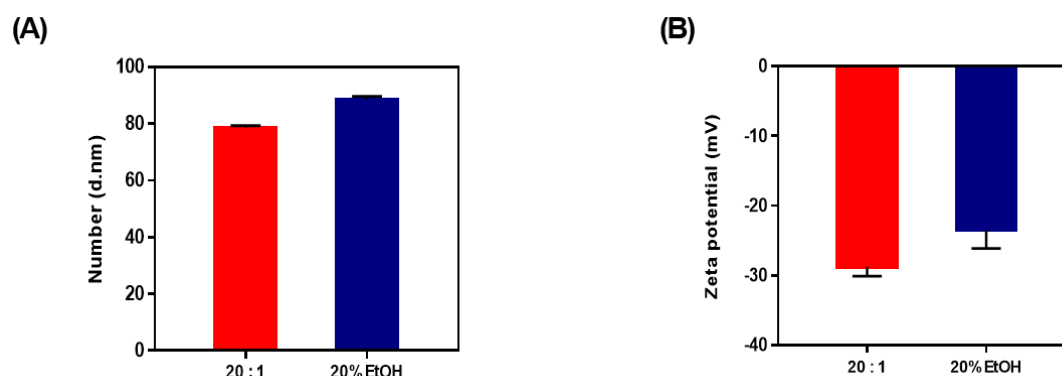

**Figure S1.** Characterization of liposome. (A) Size and (B) Zeta potential of optimized ratio of EVL-loaded liposome and EVL-loaded liposome rehydrated with 20% ethanol. Values are presented as mean  $\pm$  SD ( $n = 3$ ).

**Citation:** Lee, H.-I.; Rhim, W.-K.; Kang, E.Y.; Choi, B.; Kim, J.H.; Han, D.K. A Multilayer Functionalized Drug-Eluting Balloon for Treatment of Coronary Artery Disease. *Pharmaceutics* **2021**, *13*, 614. <https://doi.org/10.3390/pharmaceutics13050614>

Academic Editor: Sophia G. Antimisariis

Received: 31 March 2021

Accepted: 19 April 2021

Published: 23 April 2021

**Publisher's Note:** MDPI stays neutral with regard to jurisdictional claims in published maps and institutional affiliations.

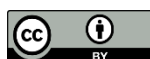

**Copyright:** © 2021 by the authors. Licensee MDPI, Basel, Switzerland. This article is an open access article distributed under the terms and conditions of the Creative Commons Attribution (CC BY) license (<http://creativecommons.org/licenses/by/4.0/>).
